# Supplementary material
Source: Research Square preprint supplement (doi:10.21203/rs.3.rs-9059706/v1)
Supplement: Supplementary file 1 [file 3daa1bddd70fda802d24f5af.pdf]

**Figure S1. Patient 1**

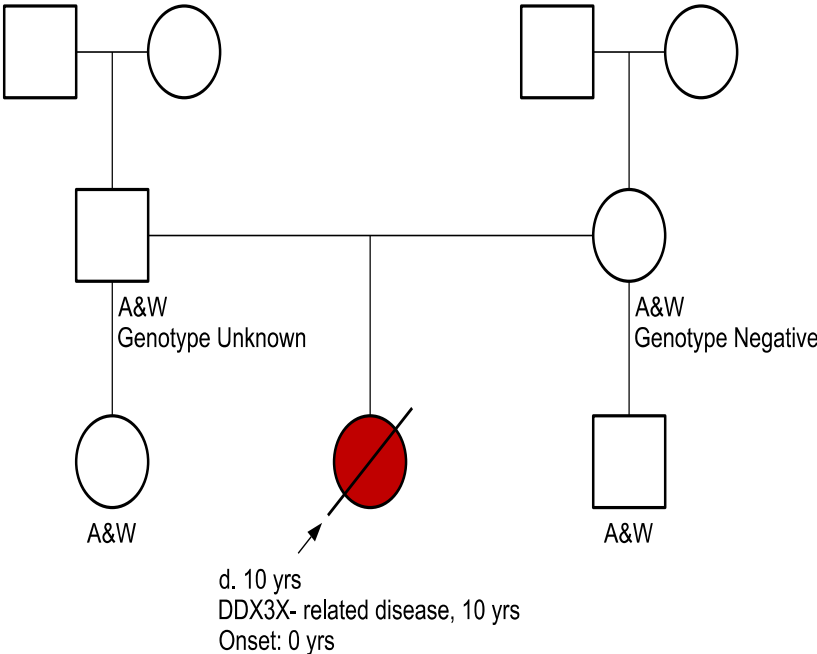

LEGEND

■ DDX3X- related disease

**Figure S2. Patient 2**

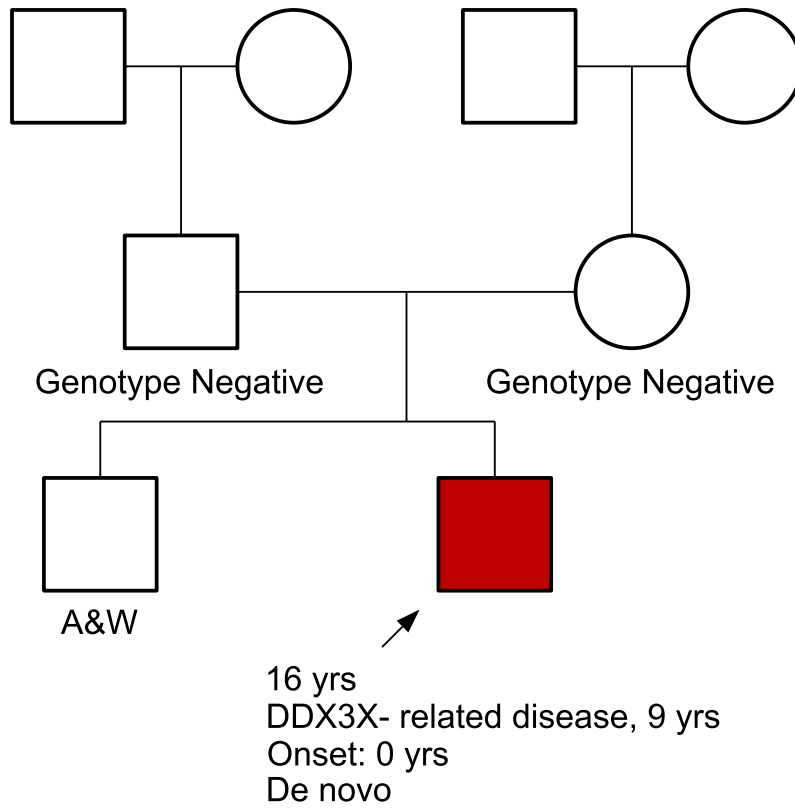

LEGEND

■ DDX3X- related disease

**Figure S3. Patient 3**

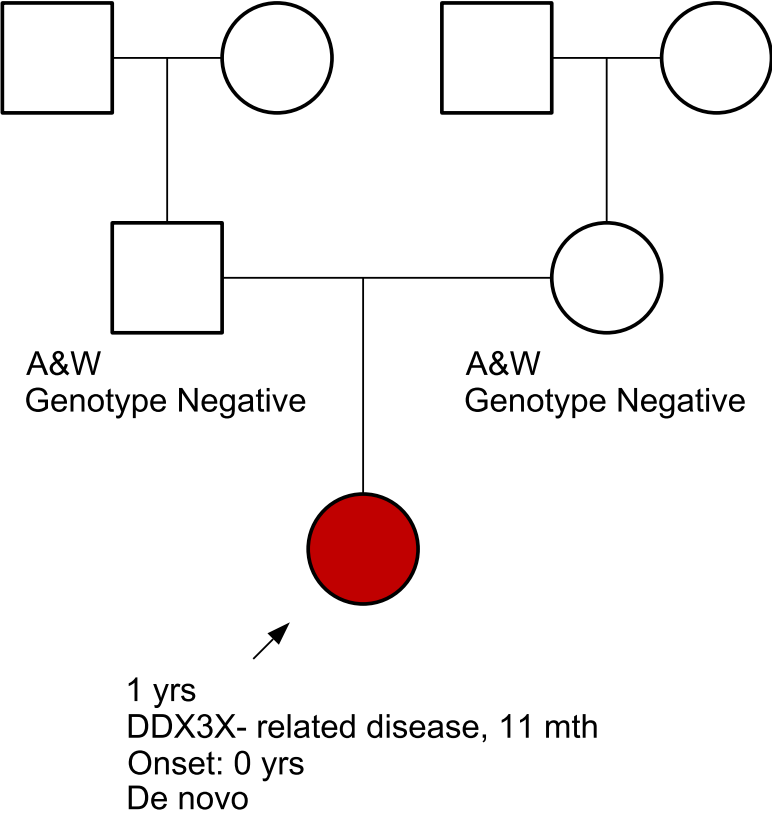

LEGEND

■ DDX3X- related disease

**Figure S4.** Patient 4

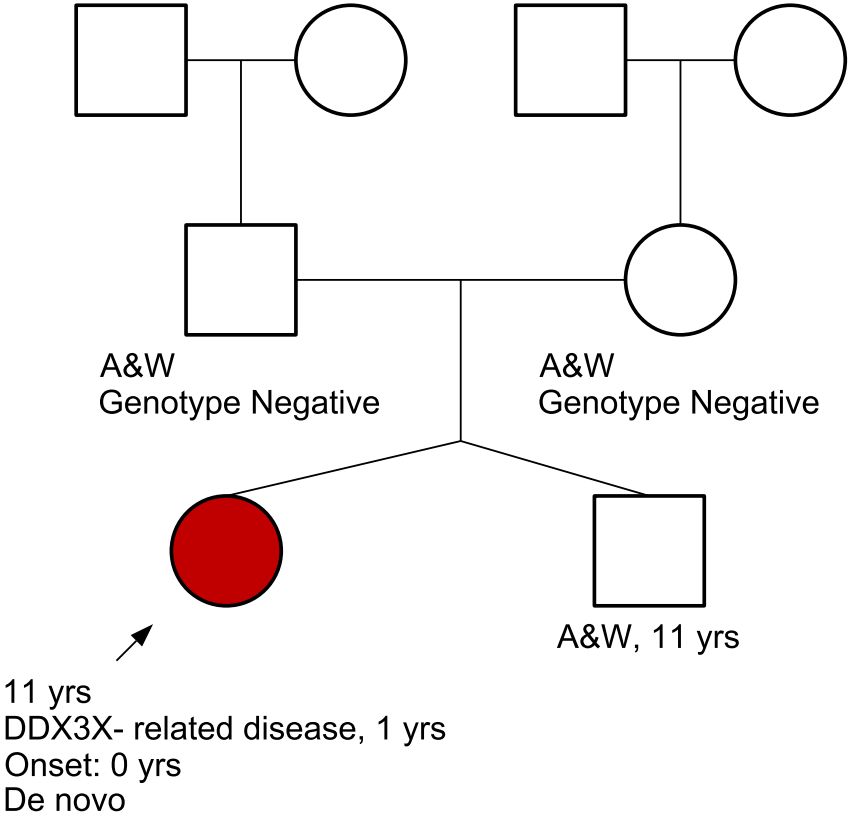

LEGEND

■ DDX3X- related disease

**Figure S5. Patient 5**

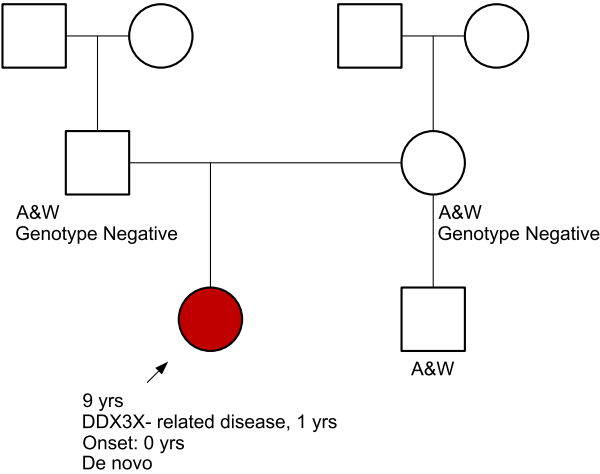

**LEGEND**  
■ DDX3X- related disease

**Figure S6. Patient 6**

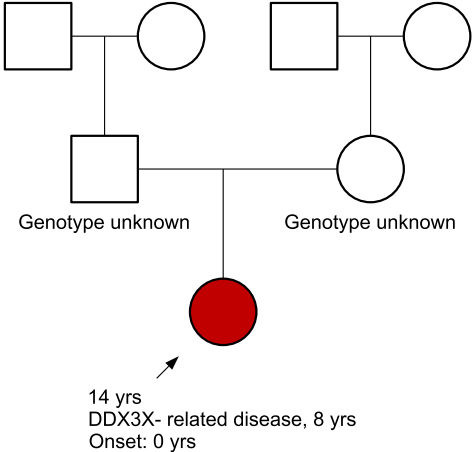

LEGEND  
■ DDX3X- related disease

**Figure S7. Patient 7**

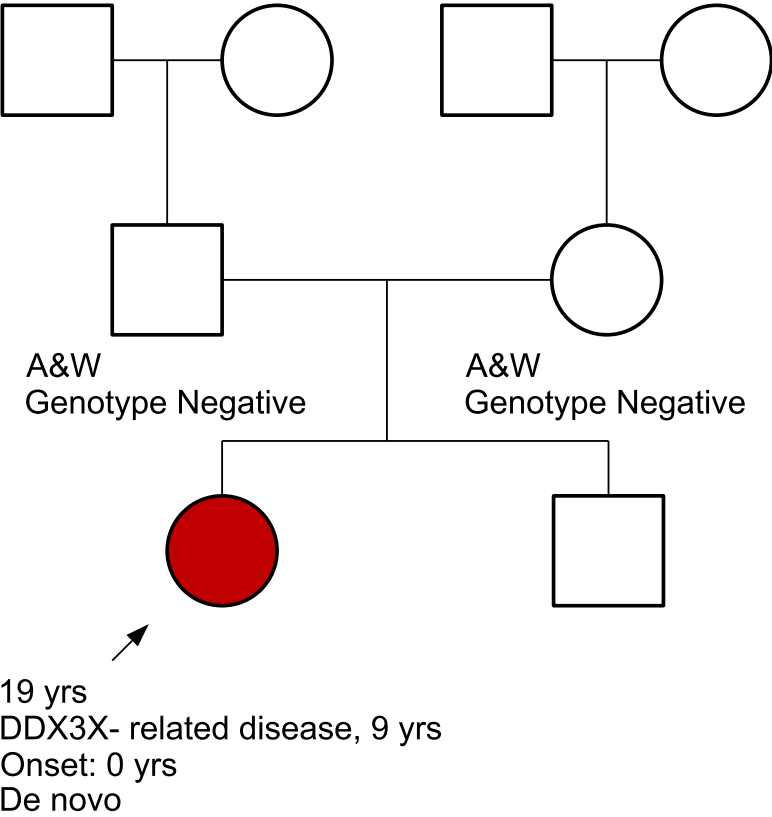

LEGEND

■ DDX3X- related disease

**Figure S8. Patient 8**

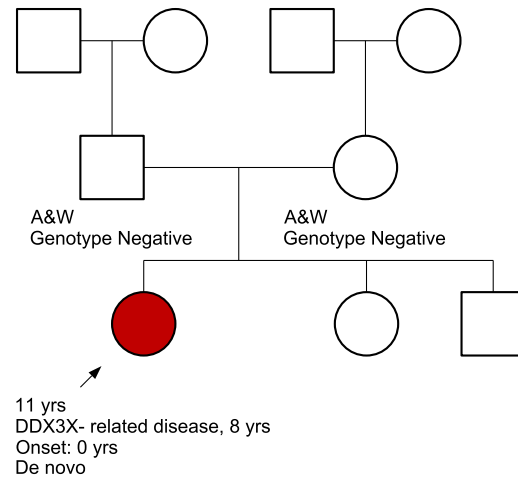

LEGEND

■ DDX3X- related disease

**Figure S9. Patient 9**

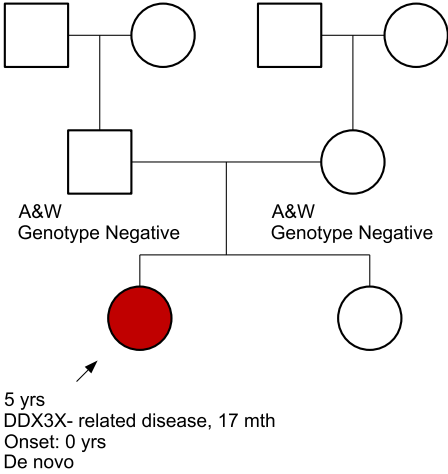

LEGEND  
■ DDX3X- related disease

**Figure S10. Patient 10**

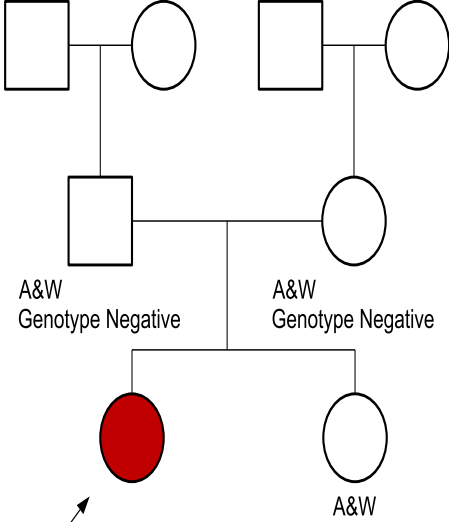

2 yrs  
DDX3X- related disease, 1 yrs  
Onset: 0 yrs  
De novo

LEGEND

■ DDX3X- related disease

**Figure S11. Patient 11**

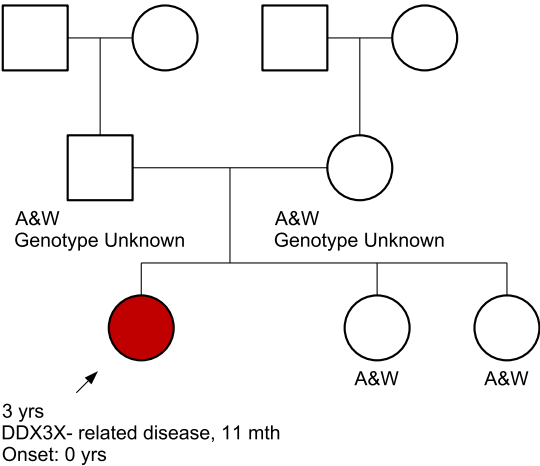

LEGEND  
■ DDX3X- related disease

**Figure S12. Patient 12**

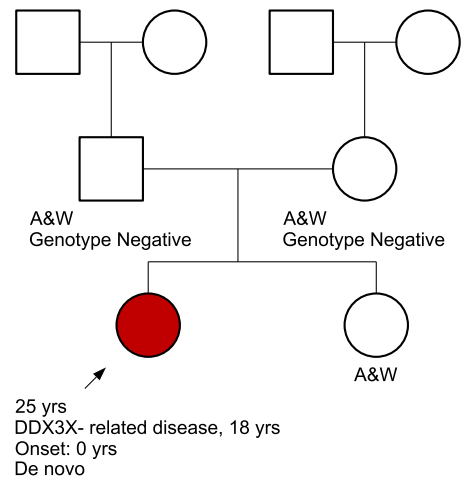

LEGEND

■ DDX3X- related disease

**Figure S13.** Patients 13 and 14

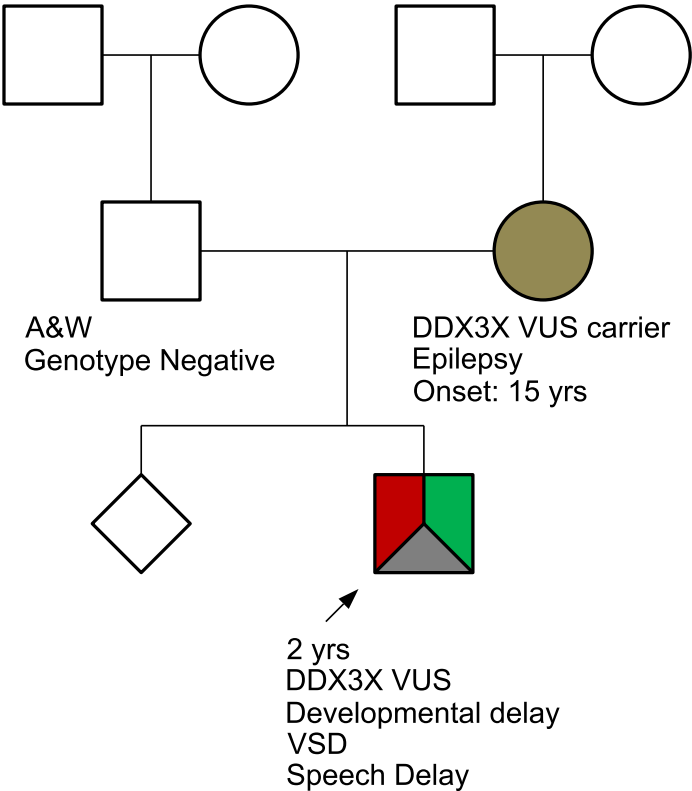

**LEGEND**

- Developmental delay
- VSD
- Speech Delay
- Epilepsy

**Table S1:** Expanded Extra cardiovascular manifestations

| Patient No.                                     | 1                                                                                | 2                   | 3                                                                           | 4                                                                                                                         | 5                     | 6            | 7                                | 8                     | 9                                                                                         | 10                                                                                     | 11                           | 12                    | 13    | 14                    |
|-------------------------------------------------|----------------------------------------------------------------------------------|---------------------|-----------------------------------------------------------------------------|---------------------------------------------------------------------------------------------------------------------------|-----------------------|--------------|----------------------------------|-----------------------|-------------------------------------------------------------------------------------------|----------------------------------------------------------------------------------------|------------------------------|-----------------------|-------|-----------------------|
| Gender / Race                                   | F / W                                                                            | M / W               | F / W                                                                       | F / W                                                                                                                     | F / Other             | F / A        | F / W                            | F / W                 | F / W                                                                                     | F / W                                                                                  | F / W                        | F / W                 | F / W | M / W                 |
| ID/DD                                           | Severe                                                                           | Moderate/<br>Severe | Mild<br>DD                                                                  | Global<br>DD                                                                                                              | Severe                | Global<br>DD | Severe                           | Mild                  | Global<br>DD                                                                              | Global<br>DD                                                                           | Mild                         | Global<br>DD          | Mild  | Global<br>DD          |
| Hypotonia/<br>Hypertonia                        | Mild<br>truncal/<br>central<br>hypotonia<br><br>Periph<br>eral<br>hyperto<br>nia | Hypertoni<br>a      | Hypot<br>onia of<br>the<br>upper<br>body<br>with<br>poor<br>head<br>control | Fluctu<br>ating<br>tone<br>(increa<br>sed<br>tone<br>with<br>hypere<br>xcitabil<br>ity<br>when<br>excited<br>or<br>upset) | Mild<br>hypotoni<br>a | -            | Hypotoni<br>a                    | Mild<br>hypot<br>onia | Mild<br>diffuse<br>hypoto<br>nia<br>with<br>preser<br>ved<br>power<br>and<br>reflexe<br>s | Centra<br>l<br>hypoto<br>nia (8<br>month<br>s)<br><br>Gener<br>alized<br>hypoto<br>nia | Centra<br>l<br>hypoto<br>nia | Mild<br>hypoto<br>nia | -     | Mild<br>hypoto<br>nia |
| Micro/Brac<br>hycephaly<br>and head<br>features | Microbr<br>achyce<br>phaly                                                       | Brachyce<br>phaly   | -                                                                           | -                                                                                                                         | Microcep<br>haly      | -            | Bitempor<br>al<br>narrowin<br>g. | -                     | Microc<br>ephaly<br><br>Bitemp<br>oral                                                    | Brach<br>yceph<br>aly                                                                  | -                            | -                     | -     | -                     |

|                   |                                                        |                                   |   |   |                                         |   |                                                     |   |                                      |                    |                                                                                   |   |                                   |   |
|-------------------|--------------------------------------------------------|-----------------------------------|---|---|-----------------------------------------|---|-----------------------------------------------------|---|--------------------------------------|--------------------|-----------------------------------------------------------------------------------|---|-----------------------------------|---|
|                   | Low forehead and anterior hairline                     |                                   |   |   | Prominent forehead                      |   |                                                     |   | narrowing.<br><br>Double hair whorls | Prominent forehead |                                                                                   |   |                                   |   |
| Movement disorder | -                                                      | Periodic limb movement disorder   | - | - | -                                       | - | -                                                   | - | Motor stereotypy                     | -                  | Mild progressive dystonia of the upper extremities with involuntary arm movements | - | -                                 | - |
| Seizures/Epilepsy | Generalized seizures (secondary to structural abnormal | Generalized tonic-clonic seizures | - | - | Myoclonus epileptic versus nonepileptic | - | Nonintractable epilepsy (unspecified epilepsy type) | - | -                                    | -                  | -                                                                                 | - | Generalized seizures (idiopathic) | - |

|                                         |                                                                                             |                                                                                                                                    |                                                                                                         |                  |                                     |   |                              |        |                                                              |   |                                                                |                                                                                  |        |                         |
|-----------------------------------------|---------------------------------------------------------------------------------------------|------------------------------------------------------------------------------------------------------------------------------------|---------------------------------------------------------------------------------------------------------|------------------|-------------------------------------|---|------------------------------|--------|--------------------------------------------------------------|---|----------------------------------------------------------------|----------------------------------------------------------------------------------|--------|-------------------------|
|                                         | malities)                                                                                   |                                                                                                                                    |                                                                                                         |                  |                                     |   |                              |        |                                                              |   |                                                                |                                                                                  |        |                         |
| Behavioral                              | -                                                                                           | Short emotional and behavioral outbursts (infancy)<br><br>ADHD                                                                     | -                                                                                                       | Stranger anxiety | History of anxiety and hair-pulling | - | -                            | -      | -                                                            | - | -                                                              | ADHD                                                                             | -      | Head banging when upset |
| Structural brain/spinal MRI abnormality | Cerebellar vermis hypoplasia with enlargement of the posterior fossa (Dandy-Walker variant) | Dandy-Walker variant with abnormal cerebellar development<br><br>Complete absence of the vermis<br><br>Extensive bilateral frontal | Spinal MRI: Low-lying conus medullaris terminating at L3 without findings for spinal dysrapism or other | Normal           | Normal                              | - | Prominent lateral ventricles | Normal | Absent posterior pituitary<br><br>Delayed myelination (mild) | - | Normal<br><br>Cerebral palsy (7 months)<br><br>Left hemiplegia | Periventricular leukomalacia<br><br>Infantile Cerebral palsy and left hemiplegia | Normal | Normal                  |

|         |                                                          |                                                                                                                                                               |                                                                                         |   |   |   |                                                                  |   |   |   |   |   |   |   |
|---------|----------------------------------------------------------|---------------------------------------------------------------------------------------------------------------------------------------------------------------|-----------------------------------------------------------------------------------------|---|---|---|------------------------------------------------------------------|---|---|---|---|---|---|---|
|         | Prominence of the atria of the lateral ventricles (mild) | <p>polymicrogyria</p> <p>Heterotopic gray matter within the right cerebellar hemisphere</p> <p>Stable soft tissue nodule along the left tentorial leaflet</p> | <p>imagining stigmata for tethered cord.</p> <p>3. Possible small left thymic cyst.</p> |   |   |   |                                                                  |   |   |   |   |   |   |   |
| CCH/CCA | CCA and septum pellucidum                                | -                                                                                                                                                             | -                                                                                       | - | - | - | CCA (partial) with an absence of the posterior body and splenium | - | - | - | - | - | - | - |



|       |                                                                                                                                    |   |   |   |   |   |   |   |   |                   |   |   |   |   |   |
|-------|------------------------------------------------------------------------------------------------------------------------------------|---|---|---|---|---|---|---|---|-------------------|---|---|---|---|---|
|       | <p>low-set ears.</p> <p>Short and bulbous nose with a broad nasal bridge</p> <p>Small mouth with thin lips</p> <p>Retrogathia.</p> |   |   |   |   |   |   |   |   | Retrogathia       |   |   |   |   |   |
| CL/CP | Bilateral CL/CP (posterior)                                                                                                        | - | - | - | - | - | - | - | - | CL/CP (posterior) | - | - | - | - | - |

|                  |                                                                                                                  |   |                                                                   |   |                                                                  |   |                                                                                                                                            |                                                                           |                                    |                                                                   |                                                                                                                     |                                        |   |   |
|------------------|------------------------------------------------------------------------------------------------------------------|---|-------------------------------------------------------------------|---|------------------------------------------------------------------|---|--------------------------------------------------------------------------------------------------------------------------------------------|---------------------------------------------------------------------------|------------------------------------|-------------------------------------------------------------------|---------------------------------------------------------------------------------------------------------------------|----------------------------------------|---|---|
| Musculo-skeletal | Pectus carinatum<br><br>Coxa valga bilaterally (mild)<br><br>Hypoplastic nails (all)<br><br>Single palmar crease | - | Left pes planovalgus.<br><br>Metatarsus adductus of the left foot | - | Long fingers<br><br>Hyperextensible and proximally placed thumbs | - | Wheeler air-bound with muscle weakness and osteopenia.<br><br>Kyphosis<br><br>Clinodactyly<br><br>Congenital dislocation of the left elbow | Clinodactyly (5 <sup>th</sup> toe and 5 <sup>th</sup> finger bilaterally) | Wide chest with wide-set nipples   | Syndactyly of the 2 <sup>nd</sup> and 3 <sup>rd</sup> toe (right) | Right-sided torticollis<br><br>Flat arches<br><br>Mild ankle pronation with externally rotated feet (while walking) | Low muscle mass<br><br>Mild osteopenia | - | - |
| Scoliosis        | -                                                                                                                | - | -                                                                 | - | -                                                                | - | -                                                                                                                                          | -                                                                         | Progressive juvenile neuromuscular | -                                                                 | -                                                                                                                   | Mild levoscoliosis                     | - | - |

|                                                    |                                                                |                                                                                     |      |   |                                                            |                    |                                                                               |        |                                                         |                                     |   |                            |   |        |
|----------------------------------------------------|----------------------------------------------------------------|-------------------------------------------------------------------------------------|------|---|------------------------------------------------------------|--------------------|-------------------------------------------------------------------------------|--------|---------------------------------------------------------|-------------------------------------|---|----------------------------|---|--------|
|                                                    |                                                                |                                                                                     |      |   |                                                            |                    |                                                                               |        | scoliosis                                               |                                     |   |                            |   |        |
| Hyperlaxity                                        |                                                                | -                                                                                   | -    | - | Joint hypermobility                                        | -                  | -                                                                             | -      | -                                                       | -                                   | - | Recurrent knee subluxation | - | -      |
| Short stature                                      | 12% ile                                                        | 7% ile                                                                              | SFGA | - | SFGA and FTT                                               | -                  | <1% ile Severe growth retardation                                             | 6% ile | -                                                       | -                                   | - | -                          | - | 3% ile |
| Precocious puberty                                 | Premature thelarche                                            | -                                                                                   | -    | - | -                                                          | -                  | -                                                                             | -      | -                                                       | -                                   | - | -                          | - | -      |
| Visual/Refractory defects.<br><br>Ophthalmopathies | Bilateral nasolacrimal dysgenesis<br><br>Dacryostenosis (left) | Bilateral lamellar cataracts<br><br>Bilateral hyperopia<br><br>Pseudophakia (right) | -    | - | Alternating exotropia<br><br>CVI with bilateral strabismus | Refractive problem | Alternating exotropia<br><br>Optic atrophy (right)<br><br>Bilateral hyperopia | -      | Accommodative esotropia with bilateral hyperopia (mild) | Alternating exotropia<br><br>Myopia | - | Strabismus                 | - | -      |

|         |                    |                              |   |   |   |   |             |   |          |   |   |   |   |                                |
|---------|--------------------|------------------------------|---|---|---|---|-------------|---|----------|---|---|---|---|--------------------------------|
|         | Amblyopia (left)   | Pseudopapilledema (right)    |   |   |   |   | astigmatism |   | Mild CVI |   |   |   |   |                                |
|         | Anisometropia      | Aphakia (left)               |   |   |   |   | CVI         |   |          |   |   |   |   |                                |
|         | Exotropia          | Retinal detachment (left)    |   |   |   |   |             |   |          |   |   |   |   |                                |
|         | Optic dysmorphism  | Band keratopathy (left)      |   |   |   |   |             |   |          |   |   |   |   |                                |
|         |                    | Optic nerve hypoplasia       |   |   |   |   |             |   |          |   |   |   |   |                                |
| Hearing | Mixed hearing loss | Conductive left hearing loss | - | - | - | - | -           | - | -        | - | - | - | - | Congenital left-sided deafness |

|                                          |                                                                                                   |                                                                                            |                                                                          |   |                                          |   |                                                                 |   |                                                                                                     |                                                                                |                                                                                |   |   |                                                                  |
|------------------------------------------|---------------------------------------------------------------------------------------------------|--------------------------------------------------------------------------------------------|--------------------------------------------------------------------------|---|------------------------------------------|---|-----------------------------------------------------------------|---|-----------------------------------------------------------------------------------------------------|--------------------------------------------------------------------------------|--------------------------------------------------------------------------------|---|---|------------------------------------------------------------------|
| Recurrent ENT infections                 | Recurrent otitis media with chronic eustachian tube dysfunction<br><br>History of sinus infection | Chronic serous otitis media, left-sided with bilateral chronic eustachian tube dysfunction | -                                                                        | - | Bilateral acute suppurative otitis media | - | Recurrent otitis media with chronic eustachian tube dysfunction | - | Bilateral serous otitis media with effusion and a structurally narrow right external auditory canal | Recurrent bilateral otitis media with effusion and eustachian tube dysfunction | Recurrent bilateral otitis media with effusion and eustachian tube dysfunction | - | - | Recurrent otitis media with chronic eustachian tube dysfunction  |
| Laryngeal/tracheal or other ENT problems | -                                                                                                 | -                                                                                          | Fusiform enlargement of the right sternocleidomastoid muscle, consistent | - | Adenotonsillar hypertrophy               | - | -                                                               | - | Laryngomalacia with initial swallowing difficulties at birth                                        | Mild tracheomalacia                                                            | Preauricular accessory tragus (bilateral)                                      | - | - | Complete tracheal rings with tracheal stenosis<br><br>Precarinal |



ADHD, Attention deficit hyperactivity deficit; BRBPR, Bright red blood per rectum; CCA, Corpus callosum agenesis; CCH, Corpus callosum hypoplasia; CVI, Cortical visual impairment; DD, Developmental delay; ENT, Ear, nose and throat; FPIES, Food protein-induced enterocolitis syndrome; FTT, Failure to thrive; GERD, Gastroesophageal reflux disease; ID, Intellectual disability; IOP, Intraocular pressure; OSA, Obstructive sleep apnea; PCOS, Polycystic ovarian syndrome; PKU, Phenylketonuria; SFGA, Small for gestational age; URTI, Upper respiratory tract infection
